# Supplementary material for: Required warfarin dose and time in therapeutic range in patients with diagnosed Nonalcoholic Fatty Liver Disease (NAFLD) or Nonalcoholic Steatohepatitis (NASH)
Source: PubMed Central journal article supplement (PMC8443040; doi:10.1371/journal.pone.0251665), 2021-09-15
Supplement: pone.0251665.s001.pdf [file pone.0251665.s001.pdf]

| <b>Outcomes</b> | <b>Parameter</b> | <b>Dose difference</b> | <b>95% CI</b>         | <b>P-value</b>    |
|-----------------|------------------|------------------------|-----------------------|-------------------|
| Warfarin<br>ADD | NAFLD/NASH       | -0.02                  | (-0.31, 0.26)         | 0.8660            |
|                 | Obesity          | <b>0.68</b>            | <b>(0.51, 0.85)</b>   | <b>&lt;0.0001</b> |
|                 | Diabetes         | <b>-0.15</b>           | <b>(-0.26, -0.03)</b> | <b>0.0103</b>     |
| TTR >60%        | <b>Parameter</b> | <b>OR</b>              | <b>95% CI</b>         | <b>P-value</b>    |
|                 | NAFLD/NASH       | 0.88                   | (0.75, 1.09)          | 0.2505            |
|                 | Obesity          | <b>0.88</b>            | <b>(0.77, 0.98)</b>   | <b>0.0281</b>     |
|                 | Diabetes         | <b>0.81</b>            | <b>(0.74, 0.88)</b>   | <b>&lt;0.0001</b> |
